**Tracheal tube fusion in *Drosophila* involves release of  
exosomes from multivesicular bodies**

Carolina Camelo<sup>1,2</sup>, Anna Körte<sup>1,2</sup>, Thea Jacobs<sup>1,2</sup>, Peter Robin Hiesinger<sup>3</sup>  
and Stefan Luschnig<sup>1,2</sup>

<sup>1</sup> Institute of Animal Physiology, University of Münster, D-48143 Münster, Germany

<sup>2</sup> Cells in Motion (CiM) Interfaculty Centre, D-48149 Münster, Germany

<sup>3</sup> Division of Neurobiology, Institute for Biology, Freie Universität Berlin, D-14195 Berlin,  
Germany

**Correspondence:** [luschnig@uni-muenster.de](mailto:luschnig@uni-muenster.de)

**Running title:** Exosomes in tracheal tube fusion

**Keywords:** Tubulogenesis, epithelial tube fusion, extracellular vesicle, multivesicular body, Rab GTPases, *Drosophila*.

## Summary

Fusion of endothelial or epithelial tubes is essential for the development of organs like the vertebrate vasculature or the insect tracheal system, but the mechanisms underlying the formation of tubular connections (anastomoses) are not well understood. Tracheal tube fusion in *Drosophila* is mediated by tip cells that transform into lumenized toroids to connect adjacent tubes. This process depends on the Munc13-4 orthologue Staccato (Stac), which localizes to tip-cell-specific lysosome-related organelles (LROs) that display features of multivesicular bodies (MVBs). We show that the tracheal lumen contains membranous extracellular vesicles (EVs), a subset of which carries Stac/Munc13-4 and is associated with tracheal anastomosis sites. The presence of LROs and luminal Stac-EVs depends on the tip-cell-specific GTPase Arl3, suggesting that Stac-EVs derive from fusion of MVBs with the luminal membrane in tip cells during anastomosis formation. The GTPases Rab27 and Rab35 cooperate downstream of Arl3 to promote Stac-MVB formation and tube fusion. We propose that Stac-MVBs act as membrane reservoirs that facilitate lumen fusion in tip cells, in a process regulated by Arl3, Rab27, Rab35, and Stac/Munc13-4.

## Introduction

Tubular organs, such as the vertebrate vasculature and the *Drosophila* tracheae, develop from separate units that fuse to form tubular networks. Although the development of tubular connections (anastomoses) is essential for organ function, the mechanisms underlying tube fusion are only beginning to be understood (Caviglia and Luschnig, 2014; Hayashi and Kondo, 2018; Kotini *et al.*, 2018). Tracheal tube fusion in *Drosophila* is mediated by specialized 'fusion' cells (FCs; Samakovlis *et al.*, 1996) at sprouting branch tips. FCs migrate towards each other and establish a new apical domain at the cell-cell contact (Gervais *et al.*, 2012; Samakovlis *et al.*, 1996; Uv *et al.*, 2003). In each FC, an axial F-actin/microtubule network is thought to guide the delivery of luminal and membrane material to the nascent luminal connection (Tanaka *et al.*, 2004). Membrane fusion depends on the Munc13-4 orthologue Staccato (Stac), which associates with lysosome-related organelles (LROs) that form specifically in FCs, but not in other tracheal cells (Caviglia *et al.*, 2016). In mammalian cells, Munc13-4 interacts with the GTPase Rab27 to promote LRO docking and exocytosis in hematopoietic cells, melanocytes, and cancer cells (Alzahofi *et al.*, 2020; Johnson *et al.*, 2011; Messenger *et al.*, 2018; Neft *et al.*, 2005; Shirakawa *et al.*, 2004). Stac-LRO formation depends on the GTPase Arl3 (Caviglia *et al.*, 2016), which was proposed to regulate targeting of the exocytosis machinery to the apical plasma membrane (Jiang *et al.*, 2007; Kakihara *et al.*, 2008). However, how LROs mediate tracheal tube fusion was not clear.

We show here that Stac/Munc13-4-containing LROs in FCs display features of multivesicular bodies (MVBs) and that Stac/Munc13-4 is secreted in extracellular vesicles (EVs) into the embryonic tracheal lumen. These EVs are associated with tracheal anastomosis sites and their presence depends on Arl3 function, suggesting that the EVs originate from Stac-MVBs in FCs. We identified Rab GTPases required for Stac MVB formation and show that Rab27 and Rab35 act in a partially redundant fashion downstream of Arl3 to promote Stac-MVB formation and tracheal tube fusion.

## Results

### Extracellular vesicles are present in the embryonic tracheal lumen

When expressed in the embryonic tracheal system, EGFP-Stac and mCherry-Stac were distributed throughout the cytoplasm of tracheal cells, while only in FCs the proteins accumulated at LROs (Fig. 1A; Caviglia *et al.*, 2016). Surprisingly, we noticed EGFP-Stac- or mCherry-Stac-positive puncta also inside the tracheal lumen of embryos at stage 15 (Fig.

1A-C; Movie S1). Extracellular EGFP-Stac puncta were submicron-sized ( $0.60 \mu\text{m} \pm 0.12 \mu\text{m}$  diameter based on confocal microscopy;  $n=19$  EVs; Fig. 1H) and were surrounded by luminal material containing the secreted protein Vermiform-mRFP (Verm-mRFP; Fig. 1A). EGFP-Stac puncta were detectable in the lumen of the dorsal trunk (DT) tube in 40% of the embryos (Fig. 1G;  $n=50$  embryos). The puncta were labeled by the membrane marker palmitoylated mKate2 (palm-mKate2; Fig. 1B), suggesting that the luminal Stac puncta are membranous extracellular vesicles (EVs). Stac puncta were also labeled by CD63-GFP, a GFP-tagged vertebrate tetraspanin that localizes to the limiting membrane and to membranes of internal vesicles of multivesicular bodies (MVBs) and is released on exosomes in mammalian tissue culture as well as in *Drosophila* (Fig. 1C; Escola *et al.*, 1998; Panáková *et al.*, 2005). Interestingly, we observed a larger pool of CD63-GFP-positive EVs, only a fraction (2%,  $n=89$  EVs in 11 embryos) of which were also positive for mCherry-Stac (Fig. 1C). EVs marked by CD63-GFP, but not by mCherry-Stac, were found in all embryos analyzed ( $n=14$ ; Fig. 1C,G) and showed an apparent size similar to EGFP-Stac-positive EVs (diameter  $0.63 \mu\text{m} \pm 0.25 \mu\text{m}$ ;  $n=79$  EVs in 11 embryos; Fig. 1H). These findings indicate that the embryonic tracheal lumen contains EVs, a subset of which accumulates Munc13-4/Stac.

### **Stac-EVs are associated with tracheal tube fusion sites**

While direct visualization of tracheal EV exocytosis events was precluded by the small diameter of the tracheal lumen during tube fusion and by the small size of EVs, we were able to trace luminal EVs in time-lapse movies to DT fusion points (Fig. S1, Movie S2), suggesting that EVs are released during the tube fusion process. Luminal EVs were largely immobile over the course of 240 minutes (Fig. S1A,B, Movie S2, Movie S3), suggesting that EVs are tethered to the fibrillar matrix that fills the embryonic tracheal lumen (Dong *et al.*, 2014; Tønning *et al.*, 2006). The EVs subsequently disappeared during tracheal liquid clearance (Fig. S1C, Movie S3). Interestingly, EGFP-Stac and mCherry-Stac-positive EVs showed a non-uniform distribution along the tracheal lumen and were frequently found close to tube fusion sites at tracheal metamere boundaries (marked by the transverse connective branch; Fig. 1I, Fig. S1C). By contrast, a subset of CD63-GFP-positive / mCherry-Stac-negative EVs were distributed more broadly throughout the lumen (Fig. 1I). These findings suggest that Stac-EVs are released by tracheal FCs and subsequently remain close to their site of release. Consistent with this notion, we did not detect Stac-EVs in the tracheal lumen of *Arl3*<sup>1</sup> embryos ( $n=50$ ), which lack Stac-LROs in FCs (Fig. 1D,G), indicating that the FC-specific GTPase Arl3 is required for Stac-EV formation, and corroborating the notion that Stac-EVs originate from FCs. Conversely, to ask whether the presence of Stac-LROs is sufficient to enable tracheal cells to release Stac-EVs, we generated ectopic Stac-LROs

throughout the tracheal system by mis-expressing Arl3 in all tracheal cells (Fig. 1E; Caviglia *et al.*, 2016). However, Arl3 misexpression did not affect the number (Fig. 1E,G) or spatial distribution (Fig. 1I) of Stac-EVs in the DT lumen, suggesting that Stac-EVs are released exclusively by FCs at tracheal anastomosis sites, even when Stac-LROs are ectopically induced in other tracheal cells. Furthermore, CD63-GFP-positive EVs were present in the tracheal lumen of tube-fusion-defective *stac*<sup>3B20</sup> embryos, albeit at reduced numbers compared to controls (Fig. 1F,G; n=10 embryos). This suggests that although the formation of these EVs does not depend on tube fusion or *stac* function, some CD63-GFP-positive EVs, possibly those also carrying Stac, are derived from tracheal tube fusion events.

### **Stac-LROs display features of multivesicular bodies**

Based on these results we hypothesized that Stac-EVs might originate from multivesicular membrane compartments in FCs. Supporting this idea, Stac-LROs were labeled by the MVB marker CD63-GFP (Fig. 2A) and mCherry-Stac was accumulating inside CD63-GFP-bounded vesicular structures (Fig. 2B), suggesting that mCherry-Stac is present in intraluminal vesicles (ILVs) of MVBs (Fig. 2B'). To test whether Stac protein can be incorporated into MVBs in a well-characterized system for MVB biology, we used *Abd-B-Gal4* to express EGFP-Stac in secondary cells of the adult testis accessory gland. These cells contain large endolysosomal multivesicular compartments and release EVs into the accessory gland lumen (Fig. S2;(Corrigan *et al.*, 2014; Fan *et al.*, 2020). Indeed, EGFP-Stac was present in ILVs inside MVBs in secondary cells, as well as in small membranous EVs in the accessory gland lumen (Fig. S2D-E). Thus, Stac can be incorporated into ILVs and can be secreted as ILV-derived EVs into the accessory gland and the tracheal lumen. Consistent with the hypothesis that Stac-MVBs secrete EVs during tube fusion, we observed Stac-MVBs between the tips of approaching FC lumina, and these MVBs appeared to fuse with the central lumen at the FC-FC interface (Fig. S3B).

### **Stac and the GTPase Arl3 function together and co-localize in tracheal cells**

The GTPase Arl3 is necessary and sufficient for Stac-LRO formation in tracheal cells (Caviglia *et al.*, 2016), and is required for the presence of Stac-EVs in the tracheal lumen (Fig. 1D,G). Arl3 may act by modulating the activity of Rab GTPases that recruit Stac to LROs, in analogy to the proposed role of Arl3 in mammalian cells (Ismail, 2011; Williams, 2011). To test whether Arl3 and Stac act in parallel or in the same pathway to promote Stac-LRO formation and tube fusion, we analyzed tracheal defects in *Arl3*<sup>1</sup> and *stac*<sup>3B20</sup> single mutant and in *Arl3*<sup>1</sup> *stac*<sup>3B20</sup> double mutant embryos (Fig. 3A-E). *Arl3*<sup>1</sup> and *stac*<sup>3B20</sup> embryos displayed tube fusion defects of similar expressivity, with on average two out of nine fused DT metamere anastomoses (Fig. 3E). Fusion defects were not enhanced in *Arl3*<sup>1</sup> *stac*<sup>3B20</sup>

double mutants (Fig. 3D,E), suggesting that Arl3 and Stac do not function independently, but act in the same pathway. Consistent with this notion, an HA-epitope-tagged Arl3 protein (Arl3-HA) colocalized with a subset of EGFP-Stac puncta when the two proteins were expressed in tracheal cells (Fig. 3F). These results suggest that Arl3 and Stac function in a common pathway to mediate the formation of Stac-MVBs.

### **Identification of Rab GTPases involved in Stac-LRO formation**

To identify factors acting downstream of Arl3 to promote Stac-LRO formation, we generated a sensitized genetic background by mis-expressing Arl3 throughout the tracheal system in EGFP-Stac-expressing embryos. This led to ectopic Stac-LROs in most tracheal cells (44±24 Stac-LROs in DT metameres 4-6, n=10; Fig. S4), whereas Stac-LROs were restricted to FCs in wild-type embryos (Fig. 1A). To identify Rab GTPases required for Stac LRO formation, we reduced in this genetic background the gene dosage of each of 26 of the 33 annotated *Drosophila* Rab GTPases by introducing null mutations of the respective *Rab* loci (Chan *et al.*, 2011; Kohrs *et al.*, 2021). We analyzed the resulting *Rab* heterozygous or hemizygous embryos by determining the number of Stac-LROs (Fig. S4). This approach revealed six Rab GTPases (*Rab8*, *Rab10*, *Rab27*, *Rab30*, *Rab35*, *Rab39*) whose reduced gene dosage led to significantly reduced Stac-LRO numbers compared to control embryos (Fig. S4B). We focused on *Rab27*, *Rab35*, and *Rab39*, which are strong candidates for regulators of late-endosomal trafficking, LRO/MVB membrane docking (Alzahofi *et al.*, 2020; Biesemann *et al.*, 2017; Caviglia *et al.*, 2016; Neeft *et al.*, 2005), or exosome release (Messenger *et al.*, 2018), whereas *Rab8*, *Rab10* and *Rab30* are predicted to play more general roles in ER morphology, Golgi sorting, and retrograde transport, respectively (Bellec *et al.*, 2018; English and Voeltz, 2013; Gillingham *et al.*, 2014; Schuck *et al.*, 2007).

### **Rab27 and Rab35 cooperate to promote Stac-LRO formation**

Having identified *Rab27*, *Rab35* and *Rab39* mutations as suppressors of ectopic Stac-LRO formation upon Arl3 misexpression, we tested whether these Rab GTPases are also required for the formation of entopic Stac-LROs in FCs of otherwise wild-type embryos. Embryos lacking maternal and zygotic *Rab27* or zygotic *Rab35* displayed significantly reduced numbers of Stac-LRO in FCs (47% and 53%, respectively, compared to control; Fig. 4A,C,D,F), suggesting that these GTPases participate in Stac-LRO formation. Surprisingly, however, the number of Stac-LROs in *Rab39* embryos was not different from control embryos (Fig. 4A,B,F), despite the suppression of ectopic Stac-LROs in Arl3-misexpressing embryos (Fig. S4), suggesting that *Rab39* is not essential for forming Stac-LROs in FCs. Because loss of *Rab27* or of *Rab35* each caused a partial reduction of Stac-LROs, we generated a *Rab27 Rab35* double mutant to ask whether *Rab27* and *Rab35*

cooperate to form Stac-LROs. Indeed, *Rab27 Rab35* embryos showed significantly fewer Stac-LROs compared to *Rab27* and *Rab35* single mutants (30.5% and 27%, respectively; Fig. 4A,C-F), suggesting that *Rab27* and *Rab35* cooperate in Stac-LRO formation. Consistent with these findings, endogenously tagged YFP::Rab35 (Fig. 4M; Caviglia *et al.*, 2016) and overexpressed YFP-Rab27 (Fig. 4N) overlapped with a subset of mCherry-Stac-LROs in FCs. Moreover, *Rab27* and *Rab35* embryos exhibited slightly reduced numbers of Stac-EVs in the tracheal lumen. 80% of *Rab27* and 76% of *Rab35* embryos showed no EVs, whereas at least one EV was detectable in 40% of control embryos (n=50 embryos per genotype). Taken together, these results suggest that *Rab27* and *Rab35* cooperate to promote the formation of Stac-LROs and possibly the release of Stac-EVs.

### **Rab27, Rab35 and Rab39 are required for tracheal tube fusion**

We finally asked whether *Rab27*, *Rab35*, and *Rab39* are required for tracheal tube fusion. While *Rab27* and *Rab39* homozygous (female) and hemizygous (male) flies were viable and fertile, *Rab35* flies were semi-lethal, with most animals dying during the pupal stage, and surviving adult *Rab35* males were sterile. Embryos lacking maternal and zygotic *Rab27* or *Rab39* and embryos lacking zygotic *Rab35* developed normally and did not show DT fusion defects (Fig. 4A-E, Fig. 4G-K). To assess more subtle tracheal defects in the mutant embryos, we analyzed dorsal branch (DB) fusion, which is more sensitive towards genetic perturbations than DT fusion. While nearly all ten DBs per embryo were fused in controls (Fig. 4G,L; n=25 embryos), *Rab35* (n=18) and *Rab39* (n=13) embryos showed on average 0.83 and 1.2 non-fused DBs, respectively, per embryo (Fig. 4G,H,J,L). By contrast, *Rab27* embryos did not show notable tracheal defects (n=16; Fig. 4I,L). However, double mutant embryos lacking zygotic *Rab27* and *Rab35* showed enhanced DB fusion defects (1.92 non-fused DBs per embryo; n=12) compared to *Rab27* and *Rab35* single mutants (Fig. 4K,L), indicating that *Rab27* and *Rab35* carry out partially redundant functions in tracheal tube fusion.

### **Discussion**

We report the presence of membranous EVs in the lumen of the developing tracheal system in *Drosophila* embryos. Intriguingly, a subset of these luminal EVs is associated with tracheal tube fusion sites and carries the Munc13-4 orthologue Stac. In tracheal fusion cells, Stac associates with LROs that display features of multivesicular membrane compartments. We show that the formation of these compartments and the presence of luminal-Stac EVs depend on the FC-specific GTPase *Arl3*, suggesting that Stac-EVs originate from fusion of Stac-MVBs with the luminal plasma membrane in tracheal tip cells. Through a systematic



survey of Rab GTPases we identified a set of Rab proteins required for Stac-MVB formation in tracheal cells. We showed that Rab27 and Rab35 act in a partially redundant manner downstream of Arl3 to promote Stac-MVB formation and tracheal tube fusion. These findings suggest that tracheal anastomosis formation proceeds through fusion of MVBs with the luminal plasma membrane in tracheal tip cells, resulting in release of EVs. Our attempts to directly visualize tracheal EV exocytosis events using the pH-sensitive fluorescent proteins pHluorin (Sankaranarayanan *et al.*, 2000) or pHuji (Shen *et al.*, 2014) fused to the lysosomal transmembrane protein Lamp1 were not successful (not shown). However, we were able to detect EVs that emerged at and remained associated with anastomosis sites upon completion of DT fusion, supporting the idea that EVs are released during tube fusion. Moreover, we showed that Stac protein is incorporated into ILVs and is secreted in exosomes when expressed in male accessory gland secondary cells, a model system for exosome biology in *Drosophila*.

How is the formation of MVBs in FCs regulated? We found that Rab27 and Rab35 act downstream of Arl3 in a cooperative fashion to promote Stac-MVB formation. Consistent with our findings in *Drosophila*, Rab27a and Rab27b (Ostrowski *et al.*, 2010) and Rab35 (Hsu *et al.*, 2010) regulate exosome secretion in mammalian cells. Moreover, the Stac homologue Munc13-4 is a key effector of Rab27a in LRO docking in hematopoietic cells and melanocytes (Alzahofi *et al.*, 2020; Johnson *et al.*, 2011; Neeft *et al.*, 2005; Shirakawa *et al.*, 2004), and regulates MVB maturation and exosome release in cancer cells (Messenger *et al.*, 2018). Whereas Rab27 and Rab35 are required for Stac-MVB formation or for anchoring Stac to these compartments, Rab39 is dispensable for FC-specific Stac-LRO formation, suggesting that it acts in a successive step, such as intracellular transport or plasma membrane docking of LROs. While our findings define a core pathway of MVB maturation and EV release in tracheal cells, additional players, *e.g.*, components of the ESCRT complex, are likely to participate in MVB formation. MVBs were identified and proposed to act as intermediates in intracellular lumen formation also in tracheal terminal cells, which like fusion cells form seamless tubes (Mathew *et al.*, 2020; Nikolova and Metzstein, 2015). Interestingly, Rab35 directs polarized transport of apical components to promote terminal cell lumen growth (Schottenfeld-Roames and Ghabrial, 2012). Whether Rab35 participates in MVB formation also in tracheal terminal cells remains to be investigated.

Exosomes were studied extensively in the context of intercellular communication and were proposed to play important roles in organ homeostasis and pathology. However, despite substantial progress in characterizing exosomes and their mode of action in cultured cells, studies of physiological functions of exosomes *in vivo* have remained scarce. For instance, exosomes are released into the seminal fluid in *Drosophila* male accessory glands and



modulate female reproductive behavior (Corrigan *et al.*, 2014). Glia-derived exosomes stimulate growth of motor neurons and tracheae in *Drosophila* larvae through exosomal microRNA-dependent gene regulation in target cells (Tsai *et al.*, 2019). Moreover, work in zebrafish revealed that cardiomyocyte-derived EVs are taken up by macrophages and endothelial cells (Scott *et al.*, 2021), and exosomes were proposed to play a role in trophic support of endothelial cells during vasculogenesis (Verweij *et al.*, 2018). It will be exciting to explore possible functions of tracheal EVs, *e.g.* in mediating long-range cell-to-cell communication across the tracheal lumen. However, it is unlikely that the luminal EVs that we discovered late-stage embryos participate in such intercellular communication, as the presence at this stage of a luminal matrix (Dong *et al.*, 2014; Tønning *et al.*, 2006) appears to constrain EV mobility, and the cuticle covering the apical surface of tracheal cells presumably prevents fusion of luminal EVs with the plasma membrane. Rather, Stac-positive EVs are likely to constitute remnants of MVB-plasma membrane fusion events during anastomosis formation. Stac-MVBs might serve as membrane reservoirs that facilitate the final step of lumen fusion. ILVs might back-fuse with the MVB limiting membrane, resulting in a rapid increase of membrane material available at the luminal membrane interfaces in FCs. Such a mechanism was described in dendritic cells, where MVBs carrying major histocompatibility complex class II (MHC II) in ILVs are reorganized after stimulation, resulting in long tubular membrane extensions and transport of MHCII to the plasma membrane (Kleijmeer *et al.*, 2001). Recruitment of ILVs to the MVB limiting membrane will increase the surface area, but may also lead to surface exposure of ILV membrane proteins that could promote membrane fusion. How MVB exocytosis and EV release are regulated in tracheal cells, and whether related mechanisms are involved in anastomosis formation in vertebrates, will be exciting subjects for future studies.

### **Acknowledgements**

We thank Wilko Backer for expert technical help, Raphael Schleutker for help with image analysis and statistics, and Yohanns Bellaïche, Marko Brankatschk, Natalie Dye, Suzanne Eaton, Shigeo Hayashi and Clive Wilson for providing fly stocks and reagents. We thank Sara Caviglia, Mylène Lancino and Raphael Schleutker for comments on the manuscript. Work in SL's laboratory was supported by the Deutsche Forschungsgemeinschaft (SFB1348 "Dynamic Cellular Interfaces"; SFB1009 "Breaking Barriers"), the "Cells-in-Motion" Cluster of Excellence (EXC 1003-CiM) and the University of Münster.

## Author contributions

Conceptualization, all authors; Methodology, all authors; Investigation, C.C., A.K., T.J.; Formal Analysis, C.C., A.K., T.J.; Visualization, C.C., A.K., T.J.; Reagents and tools, all authors; Writing – Original Draft, C.C.; Writing – Review and Editing, C.C., S.L.; Funding Acquisition, S.L.; Supervision, S.L.

## Declaration of interests

The authors declare that they have no conflict of interest.

## Materials and Methods

### *Drosophila* strains and genetics

The following *Drosophila* strains are described in FlyBase: *Abd-B-Gal4*, *btl-Gal4*, *UAS-EGFP-Stac*, *UAS-mCherry-Stac*, *UAS-Verm-mRFP*, *UAS-palm-mKate2* (Caviglia *et al.*, 2016), *UAS-CD63-GFP* (Panáková *et al.*, 2005; gift from S. Eaton), *E-Cad::3xmTagRFP* (Pinheiro *et al.*, 2017; gift from Y. Bellaiche), *Arl3<sup>1</sup>*, *UAS-Arl3* (Kakahara *et al.*, 2008; gift from S. Hayashi), *UAS-Arl3-3xHA* (Bischof *et al.*, 2007), *stac<sup>3B20</sup>* (Caviglia *et al.*, 2016), *UAS-YFP-Rab27* (Zhang *et al.*, 2007), *YFP::Rab35* (Dunst *et al.*, 2015). The collection on *Rab* null alleles are described in (Chan *et al.*, 2011; Kohrs *et al.*, 2021). Lethal *Rab* mutants were balanced using *FM7 Dfd-GMR-nvYFP*, *CyO Dfd-GMR-nvYFP*, or *TM6B Dfd-GMR-nvYFP* balancer chromosomes (Le *et al.*, 2006). For analyzing the effects of autosomal *Rab* mutations on Stac-LRO number, *btl-Gal4 UAS-EGFP-Stac* females were crossed to males carrying the *Rab<sup>-</sup>* mutation. For X-chromosomal *Rab* loci, females carrying the *Rab<sup>-</sup>* mutation were crossed to *btl-Gal4 UAS-EGFP-Stac* males. Embryos (14-18 h) were collected at 22°C. Embryos carrying the *Rab<sup>-</sup>* allele were identified by the absence of *Dfd-YFP* expression. The *y<sup>1</sup> w<sup>1118</sup>* strain was used as wild-type control.

### Constructs and transgenic flies

UAS-OLLAS-pHluorin-Lamp1 and UAS-OLLAS-pHuji-Lamp1 constructs were generated by fusing the OLLAS-pHluorin (Sankaranarayanan *et al.*, 2000) or OLLAS-pHuji (Shen *et al.*, 2014) ORFs to an N-terminal preprolactin signal peptide and C-terminally to the transmembrane domain and cytosolic domain of the human lysosomal transmembrane protein Lamp1 (Pulipparacharuvil *et al.*, 2005), which localizes to Stac-LROs in FCs (Caviglia *et al.*, 2016). The constructs were inserted into the pUASattB vector (using EcoRI

and XbaI restriction sites) and integrated into the *attP40* and *attP2* landing sites using PhiC31 integrase (Bischof *et al.*, 2007).

### **Antibodies and immunostaining**

Embryos were collected 14-18 hours after egg lay (h AEL) and 17h-18 h AEL (22°C) for analysis of DT and DB fusion defects, respectively. Embryos were fixed in 4 % formaldehyde in PBS/heptane for 20 min and devitellinized by shaking in methanol/heptane. The following primary antibodies were used: mouse anti-GFP (1:500; Sigma G6539), chicken anti-GFP (1:500; Abcam 13970), rat anti-HA (1:300; Roche 3F10). Luminal chitin was detected using the chitin-binding domain from *Bacillus circulans* chitinase A1 conjugated with SNAP-Surface AlexaFluor 488 or 563, produced as described previously (Caviglia and Luschnig, 2013).

### **Microscopy and image analysis**

For live imaging, dechorionated embryos were glued on a coverslip (0.17 mm, grade #1.5), embedded in Voltalef 10S oil and covered with a gas-permeable foil (Lumox, Sarstedt). Accessory glands were dissected from three-day-old virgin males, stained with membrane dye MM4-64 (2 nM; Santa Cruz Biotechnology) and Hoechst 33342 (1 µg/ml; Sigma) to label plasma membrane and nuclei, respectively, and were mounted on slides in cold (4°C) PBS. Imaging was performed on a Leica SP8 confocal microscope with 40x/1.3 NA and 63x/1.4 NA objectives and HyD detectors or on a Zeiss LSM710 confocal microscope with a 40x/1.1 NA objective. Images were processed using OMERO (5.4.10), Fiji (ImageJ; 1.53c), and Imaris (8.4.1, Bitplane), and were prepared in Affinity Designer (1.8.4). Cross-sections were performed using Imaris (8.4.1). Where indicated, images were deconvolved using the Leica HyVolution software in adaptive mode. Calculations were performed in R (3.5.1) using RStudio Interface (1.3.1093).

### **Quantification of EV number, diameter and distance from tracheal fusion points**

Confocal Z-stacks of living embryos (stages 15 and 16) were analyzed for intraluminal signals of EGFP-Stac, mCherry-Stac, or CD63-GFP. For measuring EV diameter, a single slice containing the EV was analyzed. EVs were segmented by applying a median filter (radius = 2) and using the Automatic Fiji threshold Intermodes. Feret's diameter of the vesicles was measured using the Analyze Particles plugin in Fiji. For measuring the distance of EVs from the closest DT anastomosis, the base of the closest transverse connective (TC) branch was used as a morphological landmark adjacent to the DT fusion point. The distance between the EV and the closest TC ( $d$ ) and the length ( $l$ ) of the corresponding DT metamere

(distance between the two flanking TCs) were measured in 3D using Imaris (8.4.1). The relative distance was calculated as follows:

$$\text{Relative distance (EV - fusion point)} = \frac{d}{l}$$

### Quantification of fusion defects

Formaldehyde-/methanol-fixed embryos were stained for luminal chitin. Chitin signal at DB (in stage 16 embryos) or DT (in stage 15 embryos) anastomoses was analyzed to determine whether the lumen was continuous or interrupted. The  $y^1 w^{1118}$  strain was used as wild-type control.

### Quantification of Stac-MVBs

Confocal Z-stacks of tracheal metameres 4-6 were acquired in living embryos expressing EGFP-Stac in tracheal cells under the control of *btl-Gal4*. Stac-LROs were segmented in 3D by applying a smooth function, enhancing contrast (0.01 % saturated pixels) and using a manually defined threshold in Fiji. The number and volume of the vesicles was determined using the 3D object counter plugin in Fiji (Bolte & Cordelières, 2006).

### Statistics

Sample size (n) was not predetermined using statistical methods, but was assessed by taking into account the variability of a given phenotype, determined by the standard deviation. Experiments were considered independent if the specimens analyzed were derived from different parental crosses. During experiments investigators were not blinded to allocation. Sample size (n) is indicated in the figure legends or graphs. Data was tested for normality using the Shapiro-Wilk test. When data was not normally distributed, the Wilcoxon rank-sum test (R standard package) was used. P values were corrected for multiple testing using the Bonferroni-Holm method (Holm, 1979). For normally distributed data, the t-test was used from the R standard package. Since the EV data consists of non-continuous counting data we applied a simulated chi-squared test as follows. For the number of EVs a contingency table was generated from which the following test-statistic was calculated:

$$Q = \sum_{i=1}^k \sum_{j=1}^l \frac{(X_{k,l} - \frac{1}{N} X_{.l} X_{k.})^2}{\frac{1}{N} X_{.l} X_{k.}}$$

, where N is the number of observations, k the number of different genotypes, and l the number of EV classes.  $X_{.l}$  and  $X_{k.}$  denote the column and row sum of the contingency table.

The p-value was determined by generating n (10000) random permutations of the data and checking how many permutations yielded a larger Q statistic than the non-permuted data.

## References

- Alzahofi, N., Welz, T., Robinson, C.L., Page, E.L., Briggs, D.A., Stainthorp, A.K., Reekes, J., Elbe, D.A., Straub, F., Kallemeijn, W.W., Tate, E.W., Goff, P.S., Sviderskaya, E.V., Cantero, M., Montoliu, L., Nedelec, F., Miles, A.K., Bailly, M., Kerkhoff, E., Hume, A.N., 2020. Rab27a coordinates actin-dependent transport by controlling organelle-associated motors and track assembly proteins. *Nature Communications* 11, 3495. <https://doi.org/10.1038/s41467-020-17212-6>
- Bellec, K., Gicquel, I., Borgne, R.L., 2018. Stratum recruits Rab8 at Golgi exit sites to regulate the basolateral sorting of Notch and Sanpodo. *Development* 145, dev163469. <https://doi.org/10.1242/dev.163469>
- Biesemann, A., Gorontzi, A., Barr, F., Gerke, V., 2017. Rab35 protein regulates evoked exocytosis of endothelial Weibel–Palade bodies. *Journal of Biological Chemistry* 292, 11631–11640. <https://doi.org/10.1074/jbc.M116.773333>
- Bischof, J., Maeda, R.K., Hediger, M., Karch, F., Basler, K., 2007. An optimized transgenesis system for *Drosophila* using germ-line-specific C31 integrases. *Proceedings of the National Academy of Sciences* 104, 3312–3317. <https://doi.org/10.1073/pnas.0611511104>
- Caviglia, S., Brankatschk, M., Fischer, E.J., Eaton, S., Luschnig, S., 2016. Staccato/Unc-13-4 controls secretory lysosome-mediated lumen fusion during epithelial tube anastomosis. *Nature Cell Biology* 18, 727–739. <https://doi.org/10.1038/ncb3374>
- Caviglia, S., Luschnig, S., 2014. Tube fusion: Making connections in branched tubular networks. *Seminars in Cell & Developmental Biology* 31, 82–90. <https://doi.org/10.1016/j.semcdb.2014.03.018>
- Caviglia, S., Luschnig, S., 2013. The ETS domain transcriptional repressor Anterior open inhibits MAP kinase and Wingless signaling to couple tracheal cell fate with branch identity. *Development* 140, 1240–1249. <https://doi.org/10.1242/dev.087874>
- Chan, C.-C., Scoggin, S., Wang, D., Cherry, S., Dembo, T., Greenberg, B., Jin, E.J., Kuey, C., Lopez, A., Mehta, S.Q., Perkins, T.J., Brankatschk, M., Rothenfluh, A., Buszczak, M., Hiesinger, P.R., 2011. Systematic Discovery of Rab GTPases with Synaptic Functions in *Drosophila*. *Current Biology* 21, 1704–1715. <https://doi.org/10.1016/j.cub.2011.08.058>
- Corrigan, L., Redhai, S., Leiblich, A., Fan, S.-J., Perera, S.M.W., Patel, R., Gandy, C., Wainwright, S.M., Morris, J.F., Hamdy, F., Goberdhan, D.C.I., Wilson, C., 2014. BMP-regulated exosomes from *Drosophila* male reproductive glands reprogram female behavior. *Journal of Cell Biology* 206, 671–688. <https://doi.org/10.1083/jcb.201401072>

- Dong, B., Hannezo, E., Hayashi, S., 2014. Balance between Apical Membrane Growth and Luminal Matrix Resistance Determines Epithelial Tubule Shape. *Cell Reports* 7, 941–950. <https://doi.org/10.1016/j.celrep.2014.03.066>
- Dunst, S., Kazimiers, T., von Zadow, F., Jambor, H., Sagner, A., Brankatschk, B., Mahmoud, A., Spann, S., Tomancak, P., Eaton, S., Brankatschk, M., 2015. Endogenously Tagged Rab Proteins: A Resource to Study Membrane Trafficking in *Drosophila*. *Developmental Cell* 33, 351–365. <https://doi.org/10.1016/j.devcel.2015.03.022>
- English, A.R., Voeltz, G.K., 2013. Rab10 GTPase regulates ER dynamics and morphology. *Nature Cell Biology* 15, 169–178. <https://doi.org/10.1038/ncb2647>
- Escola, J.-M., Kleijmeer, M.J., Stoorvogel, W., Griffith, J.M., Yoshie, O., Geuze, H.J., 1998. Selective Enrichment of Tetraspan Proteins on the Internal Vesicles of Multivesicular Endosomes and on Exosomes Secreted by Human B-lymphocytes. *Journal of Biological Chemistry* 273, 20121–20127. <https://doi.org/10.1074/jbc.273.32.20121>
- Fan, S.-J., Kroeger, B., Marie, P.P., Bridges, E.M., Mason, J.D., McCormick, K., Zois, C.E., Sheldon, H., Khalid Alham, N., Johnson, E., Ellis, M., Stefana, M.I., Mendes, C.C., Wainwright, S.M., Cunningham, C., Hamdy, F.C., Morris, J.F., Harris, A.L., Wilson, C., Goberdhan, D.C., 2020. Glutamine deprivation alters the origin and function of cancer cell exosomes. *The EMBO Journal* 39, e103009. <https://doi.org/10.15252/emj.2019103009>
- Gervais, L., Lebreton, G., Casanova, J., 2012. The making of a fusion branch in the *Drosophila* trachea. *Developmental Biology* 362, 187–193. <https://doi.org/10.1016/j.ydbio.2011.11.018>
- Gillingham, A.K., Sinka, R., Torres, I.L., Lilley, K.S., Munro, S., 2014. Toward a Comprehensive Map of the Effectors of Rab GTPases. *Developmental Cell* 31, 358–373. <https://doi.org/10.1016/j.devcel.2014.10.007>
- Hayashi, S., Kondo, T., 2018. Development and Function of the *Drosophila* Tracheal System. *Genetics* 209, 367–380. <https://doi.org/10.1534/genetics.117.300167>
- Holm, S., 1979. A Simple Sequentially Rejective Multiple Test Procedure. *Scandinavian Journal of Statistics* 6, 65–70.
- Hsu, C., Morohashi, Y., Yoshimura, S., Manrique-Hoyos, N., Jung, S., Lauterbach, M.A., Bakhti, M., Grønborg, M., Möbius, W., Rhee, J., Barr, F.A., Simons, M., 2010. Regulation of exosome secretion by Rab35 and its GTPase-activating proteins TBC1D10A–C. *Journal of Cell Biology* 189, 223–232. <https://doi.org/10.1083/jcb.200911018>
- Ismail, S.A., 2011. Arl2-GTP and Arl3-GTP regulate a GDI-like transport system for farnesylated cargo. *Nature Chemical Biology* 7, 8.
- Jiang, L., Rogers, S.L., Crews, S.T., 2007. The *Drosophila* Dead end Arf-like3 GTPase controls vesicle trafficking during tracheal fusion cell morphogenesis. *Developmental Biology* 311, 487–499. <https://doi.org/10.1016/j.ydbio.2007.08.049>



- Johnson, J.L., Hong, H., Monfregola, J., Kiosses, W.B., Catz, S.D., 2011. Munc13-4 Restricts Motility of Rab27a-expressing Vesicles to Facilitate Lipopolysaccharide-induced Priming of Exocytosis in Neutrophils. *Journal of Biological Chemistry* 286, 5647–5656. <https://doi.org/10.1074/jbc.M110.184762>
- Kakihara, K., Shinmyozu, K., Kato, K., Wada, H., Hayashi, S., 2008. Conversion of plasma membrane topology during epithelial tube connection requires Arf-like 3 small GTPase in *Drosophila*. *Mechanisms of Development* 125, 325–336. <https://doi.org/10.1016/j.mod.2007.10.012>
- Kleijmeer, M., Ramm, G., Schuurhuis, D., Griffith, J., Rescigno, M., Ricciardi-Castagnoli, P., Rudensky, A.Y., Ossendorp, F., Melief, C.J.M., Stoorvogel, W., Geuze, H.J., 2001. Reorganization of multivesicular bodies regulates MHC class II antigen presentation by dendritic cells. *Journal of Cell Biology* 155, 53–64. <https://doi.org/10.1083/jcb.200103071>
- Kohrs, F.E., Daumann, I.-M., Pavlovic, B., Jin, E.J., Kiral, F.R., Lin, S.-C., Port, F., Wolfenberger, H., Mathejczyk, T.F., Linneweber, G.A., Chan, C.-C., Boutros, M., Hiesinger, P.R., 2021. Systematic functional analysis of Rab GTPases reveals limits of neuronal robustness to environmental challenges in flies. *eLife* 10, e59594. <https://doi.org/10.7554/eLife.59594>
- Kotini, M.P., Mäe, M.A., Belting, H.-G., Betsholtz, C., Affolter, M., 2018. Sprouting and anastomosis in the *Drosophila* trachea and the vertebrate vasculature: Similarities and differences in cell behaviour. *Vascular Pharmacology*. <https://doi.org/10.1016/j.vph.2018.11.002>
- Le, T., Liang, Z., Patel, H., Yu, M.H., Sivasubramaniam, G., Slovitt, M., Tanentzapf, G., Mohanty, N., Paul, S.M., Wu, V.M., Beitel, G.J., 2006. A New Family of *Drosophila* Balancer Chromosomes With a *w- dfd*-GMR Yellow Fluorescent Protein Marker. *Genetics* 174, 2255–2257. <https://doi.org/10.1534/genetics.106.063461>
- Mathew, R., Rios-Barrera, L.D., Machado, P., Schwab, Y., Leptin, M., 2020. Transcytosis via the late endocytic pathway as a cell morphogenetic mechanism. *The EMBO Journal* 39, e105332. <https://doi.org/10.15252/embj.2020105332>
- Messenger, S.W., Woo, S.S., Sun, Z., Martin, T.F.J., 2018. A Ca<sup>2+</sup>-stimulated exosome release pathway in cancer cells is regulated by Munc13-4. *Journal of Cell Biology* 217, 2877–2890. <https://doi.org/10.1083/jcb.201710132>
- Neeft, M., Wieffer, M., de Jong, A.S., Negroiu, G., Metz, C.H.G., van Loon, A., Griffith, J., Krijgsveld, J., Wulffraat, N., Koch, H., Heck, A.J.R., Brose, N., Kleijmeer, M., van der Sluijs, P., 2005. Munc13-4 Is an Effector of Rab27a and Controls Secretion of Lysosomes in Hematopoietic Cells. *Molecular Biology of the Cell* 16, 731–741. <https://doi.org/10.1091/mbc.e04-10-0923>
- Nikolova, L.S., Metzstein, M.M., 2015. Intracellular lumen formation in *Drosophila* proceeds via a novel subcellular compartment. *Development* 142, 3964–3973. <https://doi.org/10.1242/dev.127902>
- Ostrowski, M., Carmo, N.B., Krumeich, S., Fanget, I., Raposo, G., Savina, A., Moita, C.F., Schauer, K., Hume, A.N., Freitas, R.P., Goud, B., Benaroch, P., Hacohen, N., Fukuda, M., Desnos, C.,

- Seabra, M.C., Darchen, F., Amigorena, S., Moita, L.F., Thery, C., 2010. Rab27a and Rab27b control different steps of the exosome secretion pathway. *Nature Cell Biology* 12, 19–30. <https://doi.org/10.1038/ncb2000>
- Panáková, D., Sprong, H., Marois, E., Thiele, C., Eaton, S., 2005. Lipoprotein particles are required for Hedgehog and Wingless signalling. *Nature* 435, 58–65. <https://doi.org/10.1038/nature03504>
- Pinheiro, D., Hannezo, E., Herszterg, S., Bosveld, F., Gaugue, I., Balakireva, M., Wang, Z., Cristo, I., Rigaud, S.U., Markova, O., Bellaïche, Y., 2017. Transmission of cytokinesis forces via E-cadherin dilution and actomyosin flows. *Nature* 545, 103–107. <https://doi.org/10.1038/nature22041>
- Pulipparacharuvil, S., Akbar, M.A., Ray, S., Sevrioukov, E.A., Haberman, A.S., Rohrer, J., Krämer, H., 2005. *Drosophila* Vps16A is required for trafficking to lysosomes and biogenesis of pigment granules. *Journal of Cell Science* 118, 3663–3673. <https://doi.org/10.1242/jcs.02502>
- Samakovlis, C., Hacohen, N., Manning, G., Sutherland, D.C., Guillemin, K., Krasnow, M.A., 1996. Development of the *Drosophila* tracheal system occurs by a series of morphologically distinct but genetically coupled branching events. *Development* 122, 1395–1407. <https://doi.org/10.1242/dev.122.5.1395>
- Sankaranarayanan, S., Angelis, D.D., Rothman, J.E., Ryan, T.A., 2000. The Use of pHluorins for Optical Measurements of Presynaptic Activity. *Biophysical Journal* 79, 2199–2208. [https://doi.org/10.1016/S0006-3495\(00\)76468-X](https://doi.org/10.1016/S0006-3495(00)76468-X)
- Schottenfeld-Roames, J., Ghabrial, A.S., 2012. Whacked and Rab35 polarize dynein-motor-complex-dependent seamless tube growth. *Nature Cell Biology* 14, 386–393. <https://doi.org/10.1038/ncb2454>
- Schuck, S., Gerl, M.J., Ang, A., Manninen, A., Keller, P., Mellman, I., Simons, K., 2007. Rab10 is Involved in Basolateral Transport in Polarized Madin–Darby Canine Kidney Cells. *Traffic* 8, 47–60. <https://doi.org/10.1111/j.1600-0854.2006.00506.x>
- Scott, A., Sueiro Ballesteros, L., Bradshaw, M., Tsuji, C., Power, A., Lorriman, J., Love, J., Paul, D., Herman, A., Emanuelli, C., Richardson, R.J., 2021. In Vivo Characterization of Endogenous Cardiovascular Extracellular Vesicles in Larval and Adult Zebrafish. *Arteriosclerosis, Thrombosis, and Vascular Biology*. <https://doi.org/10.1161/ATVBAHA.121.316539>
- Shen, Y., Rosendale, M., Campbell, R.E., Perrais, D., 2014. pHuji, a pH-sensitive red fluorescent protein for imaging of exo- and endocytosis. *Journal of Cell Biology* 207, 419–432. <https://doi.org/10.1083/jcb.201404107>
- Shirakawa, R., Higashi, T., Tabuchi, A., Yoshioka, A., Nishioka, H., Fukuda, M., Kita, T., Horiuchi, H., 2004. Munc13-4 Is a GTP-Rab27-binding Protein Regulating Dense Core Granule Secretion in Platelets. *Journal of Biological Chemistry* 279, 10730–10737. <https://doi.org/10.1074/jbc.M309426200>

- Tanaka, H., Takasu, E., Aigaki, T., Kato, K., Hayashi, S., Nose, A., 2004. Formin3 is required for assembly of the F-actin structure that mediates tracheal fusion in *Drosophila*. *Developmental Biology* 274, 413–425. <https://doi.org/10.1016/j.ydbio.2004.07.035>
- Tonning, A., Helms, S., Schwarz, H., Uv, A.E., Moussian, B., 2006. Hormonal regulation of mummy is needed for apical extracellular matrix formation and epithelial morphogenesis in *Drosophila*. *Development* 133, 331–341. <https://doi.org/10.1242/dev.02206>
- Tsai, Y.-W., Sung, H.-H., Li, J.-C., Yeh, C.-Y., Chen, P.-Y., Cheng, Y.-J., Chen, C.-H., Tsai, Y.-C., Chien, C.-T., 2019. Glia-derived exosomal miR-274 targets Sprouty in trachea and synaptic boutons to modulate growth and responses to hypoxia. *Proceedings of the National Academy of Sciences* 116, 24651–24661. <https://doi.org/10.1073/pnas.1902537116>
- Uv, A., Cantera, R., Samakovlis, C., 2003. *Drosophila* tracheal morphogenesis: intricate cellular solutions to basic plumbing problems. *Trends in Cell Biology* 13, 301–309. [https://doi.org/10.1016/S0962-8924\(03\)00083-7](https://doi.org/10.1016/S0962-8924(03)00083-7)
- Verweij, F.J., Bebelman, M.P., Jimenez, C.R., Garcia-Vallejo, J.J., Janssen, H., Neefjes, J., Knol, J.C., de Goeij-de Haas, R., Piersma, S.R., Baglio, S.R., Verhage, M., Middeldorp, J.M., Zomer, A., van Rheenen, J., Coppolino, M.G., Hurbain, I., Raposo, G., Smit, M.J., Toonen, R.F.G., van Niel, G., Pegtel, D.M., 2018. Quantifying exosome secretion from single cells reveals a modulatory role for GPCR signaling. *Journal of Cell Biology* 217, 1129–1142. <https://doi.org/10.1083/jcb.201703206>
- Wainwright, S.M., Hopkins, B.R., Mendes, C.C., Sekar, A., Kroeger, B., Hellberg, J.E.E.U., Fan, S.-J., Pavey, A., Marie, P.P., Leiblich, A., Sepil, I., Charles, P.D., Thézénas, M.L., Fischer, R., Kessler, B.M., Gandy, C., Corrigan, L., Patel, R., Wigby, S., Morris, J.F., Goberdhan, D.C.I., Wilson, C., 2021. *Drosophila* Sex Peptide controls the assembly of lipid microcarriers in seminal fluid. *Proceedings of the National Academy of Sciences* 118. <https://doi.org/10.1073/pnas.2019622118>
- Williams, R.L., 2011. Airls squeeze the fat out. *Nature Chemical Biology* 7, 863–864. <https://doi.org/10.1038/nchembio.713>
- Zhang, J., Schulze, K.L., Hiesinger, P.R., Suyama, K., Wang, S., Fish, M., Acar, M., Hoskins, R.A., Bellen, H.J., Scott, M.P., 2007. Thirty-One Flavors of *Drosophila* Rab Proteins. *Genetics* 176, 1307–1322. <https://doi.org/10.1534/genetics.106.066761>

## Figure legends

### Figure 1. Extracellular vesicles are present in the embryonic tracheal lumen.

**(A-B)** Lateral view of living embryos (stage 15) expressing EGFP-Stac (green) and Vermiform-mRFP (Verm-mRFP, magenta; A) or EGFP-Stac (green) and palmitoylated mKate2 (palm-mKate2, magenta; B) in tracheal cells under the control of *btl-Gal4*. (A', B') are close-ups of the regions indicated in (A, B). EGFP-Stac is distributed throughout the cytosol and accumulates at LROs (open arrowheads) only in tracheal fusion cells. Note Stac-positive EVs (filled arrowheads) in the dorsal trunk lumen. Owing to limited axial resolution, EVs could not be identified unambiguously in the smaller-caliber lumina of other tracheal branches.

**(C)** Lateral view of living embryos (stage 15) expressing CD63-GFP (green) and mCherry-Stac (magenta) in tracheal cells. CD63-GFP labels mCherry-Stac-positive EVs (filled arrowhead) and mCherry-Stac-negative EVs (open arrowhead).

**(D-E)** Lateral view of living *Arl3<sup>1</sup>* embryo (stage 15) expressing EGFP-Stac in tracheal cells in (D) and embryo co-expressing EGFP-Stac and Arl3 in tracheal cells (E). (D' and E') are close-ups indicated in (D, E). Note that Stac-LROs and Stac-EVs are absent in *Arl3<sup>1</sup>* mutant (D), whereas Stac-LROs are induced ectopically upon Arl3 misexpression (E).

**(F)** Lateral view of living *stac<sup>3B20</sup>* embryo (stage 15) expressing CD63-GFP (green) and palm-mKate2 (magenta) in tracheal cells. (F') shows close-up of region indicated in (F).

**(G)** Quantification of EVs per embryo. Number of embryos (n) is indicated.

**(H)** Diameter of Stac-positive and Stac-negative EVs as detected by confocal microscopy. Each data point in the graph represents one EV. Number of embryos (n) is indicated.

**(I)** Quantification of the relative distance of EVs to the closest tracheal fusion point (marked by adjacent transverse connective (TC) branch; asterisk) in the DT tube. Each data point represents one EV. Mean +/- SD and the number of embryos scored (n) are indicated. T-test: \*\* p < 0.001; ns, not significant.

Scale bars: (A-F) 50  $\mu$ m; (A', B', C', D', E', F') 10  $\mu$ m; cross-sections 2  $\mu$ m.

### Figure 2. Stac-MVBs colocalize with CD63-GFP and localize between invading lumina.

**(A)** Dorsal view of living embryo (stage 15) expressing the MVB marker CD63-GFP (green) and mCherry-Stac (magenta) in tracheal cells. Note that mCherry-Stac colocalizes with CD63-GFP (arrowheads). (A') shows close-up of region indicated in (A).

**(B)** Close-up of mCherry-Stac puncta. Note that mCherry-Stac signals are bounded by CD63-GFP. The image was processed using deconvolution.

Scale bars: (A) 50  $\mu$ m; (A') 10  $\mu$ m; (B) 1  $\mu$ m.

**Figure 3. Arl3 and Stac act in the same pathway and co-localize in tracheal cells.**

**(A-D)** Lateral views of control (*y w*; A), *Arl3*<sup>1</sup> (B), *stac*<sup>3B20</sup> (C) and *Arl3*<sup>1</sup> *stac*<sup>3B20</sup> (D) double mutant embryos (stage 15) stained for chitin to label tracheal lumen. Asterisks indicate DT tube fusion defects.

**(E)** Quantification of DT fusion defects. Control (*y w*) embryos show nine anastomoses (each indicating a successful fusion event) per DT tube. Note that *Arl3*<sup>1</sup> and *stac*<sup>3B20</sup> single mutants show DT fusion defects of similar extent as in *Arl3*<sup>1</sup> *stac*<sup>3B20</sup> double mutants. Number of embryos (n) is indicated. Wilcoxon rank-sum test: \*\*\*\*  $p < 0.0001$ ; ns, not significant.

**(F)** Lateral view of embryo expressing EGFP-Stac (green) and Arl3-HA (magenta) in tracheal cells. Chitin (cyan) labels tracheal lumen. Note that Arl3-HA colocalizes with a subset of EGFP-Stac puncta (arrowheads).

Scale bars: (A,B,C,D,F) 50  $\mu\text{m}$ ; (F') 10  $\mu\text{m}$ .

**Figure 4. Rab27 and Rab35 act downstream of Arl3 to regulate Stac-MVB formation.**

**(A-E)** Lateral views of embryos (stage 15) of the indicated genotypes expressing EGFP-Stac in tracheal cells under the control of *btl-Gal4*. (A'-D') are close-ups indicated in (A-D). Note the presence of EGFP-Stac-MVBs in tracheal fusion cells.

**(F)** Quantification of EGFP-Stac-MVBs in DT metameres 4-6. Genotypes and number of embryos scored (n) are indicated. Wilcoxon rank-sum test: \*\*  $p < 0.001$ ; ns, not significant.

**(G-K)** Dorsal views of embryos (stage 16) of the indicated genotypes. Chitin staining labels the tracheal lumen. (F'-J') are close-ups indicated in (F-J).

**(L)** Quantification of DB fusion defects. Number of fused DBs per embryo is indicated by different shades of grey. Number of embryos (n) is indicated. Permutation statistical test: \*\*\*  $p < 0.0001$ .

**(M)** DB FCs of embryo expressing mCherry-Stac (magenta) and YFP-Rab27 (green) under the control of *btl-Gal4*.

**(N)** DB FCs of embryo expressing mCherry-Stac (magenta) under the control of *btl-Gal4* and endogenously tagged YFP::Rab35 (green).

Scale bars: (A,B,C,D,E, A',B',C',D',E') 10  $\mu\text{m}$ ; (G,H,I,J,K) 50  $\mu\text{m}$ ; (G',H',I',J',K'), 10  $\mu\text{m}$ ; (M,N) 10  $\mu\text{m}$ .

## Supplemental Figures

### Figure S1. Extracellular vesicles appear after dorsal trunk fusion and remain in close proximity to tracheal anastomosis sites.

**(A,B)** Stills from time-lapse movies of living embryos (stage 13) expressing palm-mKate2 (magenta) and EGFP-Stac (green, A) or palm-mKate2 (magenta) and CD63-GFP (green, B) in tracheal cells after DT tube fusion (0 min). EGFP-Stac-positive EVs (A, arrowhead) and CD63-GFP-positive EVs (B, arrowhead) appeared after DT fusion and remained in close proximity to the DT anastomosis site. Tracheal lumen in (A, cross-section) is indicated by a dashed line. Stills in (B) are from Movie S2.

**(C)** Stills from time-lapse movie of embryo (stage 15) expressing EGFP-Stac in tracheal cells. Note that the Stac-positive EV (arrowhead) is largely immobile over 247 min and rapidly disappears during subsequent luminal liquid clearance (261 min). **(C')** Kymograph of EGFP-Stac signal within the area indicated by a dashed rectangle in (C). Stills are from Movie S3.

Scale bars: 10  $\mu\text{m}$ .

### Figure S2. Stac localizes to intraluminal vesicles in secondary cells and in exosomes in the accessory gland lumen.

**(A)** Scheme illustrating male reproductive male tract with accessory gland comprising main cells (light blue) and secondary cells (green). Secondary cells contain large endolysosomal vacuoles with ILVs, which are secreted as exosomes into the accessory gland lumen. Nuclei of the binucleate main and secondary cells are shown in cyan.

**(B-E)** Accessory glands of 3-day-old virgin male expressing EGFP-Stac (green) in secondary cells under the control of *Abd-B-Gal4*. Cell membranes are labeled with MM4-64 (magenta) and nuclei with Hoechst 33342 (cyan). **(C)** Accessory gland tip with secondary cells marked by EGFP-Stac expression (green). **(D)** Close-up of a single secondary cell shows that EGFP-Stac accumulates in ILVs (arrowhead) inside large MVBs. **(E)** Cross-section of the accessory gland tip (single plane, Z-depth 23.5  $\mu\text{m}$ ). Note that Stac-EVs (arrowhead) are detectable inside the accessory gland lumen, which also contains membranous microcarriers (Wainwright *et al.*, 2021) labeled by MM4-64. **(E')** shows a close-up of the region indicated in (E).

Scale bars: (B) 500  $\mu\text{m}$ ; (C) 100  $\mu\text{m}$ ; (D, E, E') 10  $\mu\text{m}$ .

**Figure S3. Stac-MVBs localize between invading lumina and the FC-FC interface.**

**(A)** Scheme illustrating the localization of Stac-MVBs (green) in tracheal fusion cells (FCs). Adherens junctions (magenta) between fusion cells and the invading stalk cell (SC) lumina, and between FCs and the central lumen at the FC-FC interface are indicated. Tracheal cells are shown in petrol and the tracheal lumen in yellow.

**(B)** Dorsal branch fusion cells in embryo (stage 15) expressing endogenously tagged E-Cad::3xmTagRFP (magenta) and EGFP-Stac (green) in tracheal cells. (B') shows a time series of the region marked in (B). Time is indicated. Arrowheads indicate Stac-positive MVBs that appear to merge with the central lumen at  $t=40$  s. In single-channel images, EGFP-Stac intensities are displayed as a heat map (range indicated in (B)). Images were processed using Leica Lightning deconvolution in adaptive mode. The scheme to the right illustrates the position of EGFP-Stac MVBs (green) and E-Cad-labeled adherens junctions (magenta).

**(C)** Intensity profiles of EGFP-Stac and E-Cad::3xmTagRFP along the dashed line in (B'). Scale bars: (B) 5  $\mu\text{m}$ ; (B') 1  $\mu\text{m}$ .

**Figure S4. Identification of Rab GTPases involved in Stac-MVB formation.**

**(A)** Lateral view of dorsal trunk metameres 4-6 in living embryos (stage 15) expressing EGFP-Stac and Arl3 in tracheal cells under the control of *btl-Gal4*. Embryos carry a mutation in the indicated *Rab* locus. In case of X-chromosomal *Rab* loci (*Rab10*, *18*, *21*, *27*, *35*, *39*, *40*) embryos are either heterozygous or hemizygous for the mutation. For the remaining (autosomal) *Rab* loci, embryos are heterozygous for the mutation. *y w* was used as wild-type control (first panel). Note that EGFP-Stac-MVBs are ectopically induced throughout the tracheal system upon Arl3 misexpression. Embryos were scored for modification of the number of EGFP-Stac-MVBs by the *Rab* mutations.

**(B)** Quantification of Stac-MVBs in metameres 4-6 of embryos hetero- or hemizygous for the indicated *Rab* mutation. Stac-MVBs were quantified in 20 embryos per genotype. Wilcoxon rank-sum test: \*  $p < 0.05$ .

**Figure S5. Stages of tracheal tube fusion and model for extracellular vesicle release at tracheal fusion points.**

**(A)** Steps of tracheal tube fusion. Fusion cells (FCs; green) migrate towards each other. After establishing contact, a central lumen is formed at the cell-cell interface. Subsequent



fusion of the invading stalk cell (SC; grey) lumina with the central lumen yields a luminal connection. Apical domains are indicated in orange and lumen in yellow.

**(B)** Hypothetical model of fusion between luminal membranes and Stac-MVBs in FCs. In the model, Stac-positive EVs are released into the lumen upon fusion of Stac-containing MVBs with the luminal plasma membrane in FCs. (B') shows close-up of region marked in (B).

## **Supplemental Movies**

### **Supplemental Movie 1**

EGFP-Stac-positive extracellular vesicles are present in the tracheal lumen. 3-D animation of the dorsal trunk lumen of an embryo expressing EGFP-Stac (green) and Verm-mRFP (magenta; labeling the lumen) in tracheal cells. Rendering of the tracheal lumen was performed in Imaris using the Surfaces function.

### **Supplemental Movie 2**

Time-lapse movie of embryo expressing CD63-GFP (green) and palm-mKate2 (magenta) after DT fusion. A single confocal section containing a CD63-GFP-positive EV is shown. CD63-GFP-positive EVs appear after DT fusion and remain in close proximity to tube fusion sites.

### **Supplemental Movie 3**

Time-lapse movie of embryo (stage 15) expressing EGFP-Stac (green) and palm-mKate2 (magenta) in tracheal cells. A single confocal section containing a EGFP-Stac-positive EV is shown. Note that EGFP-Stac EVs are immobile inside the tracheal lumen, but start to move and subsequently disappear rapidly during luminal liquid clearance (beginning at t=240 minutes).

# Figure 1

bioRxiv preprint doi: <https://doi.org/10.1101/2021.08.22.457102>; this version posted August 25, 2021. The copyright holder for this preprint

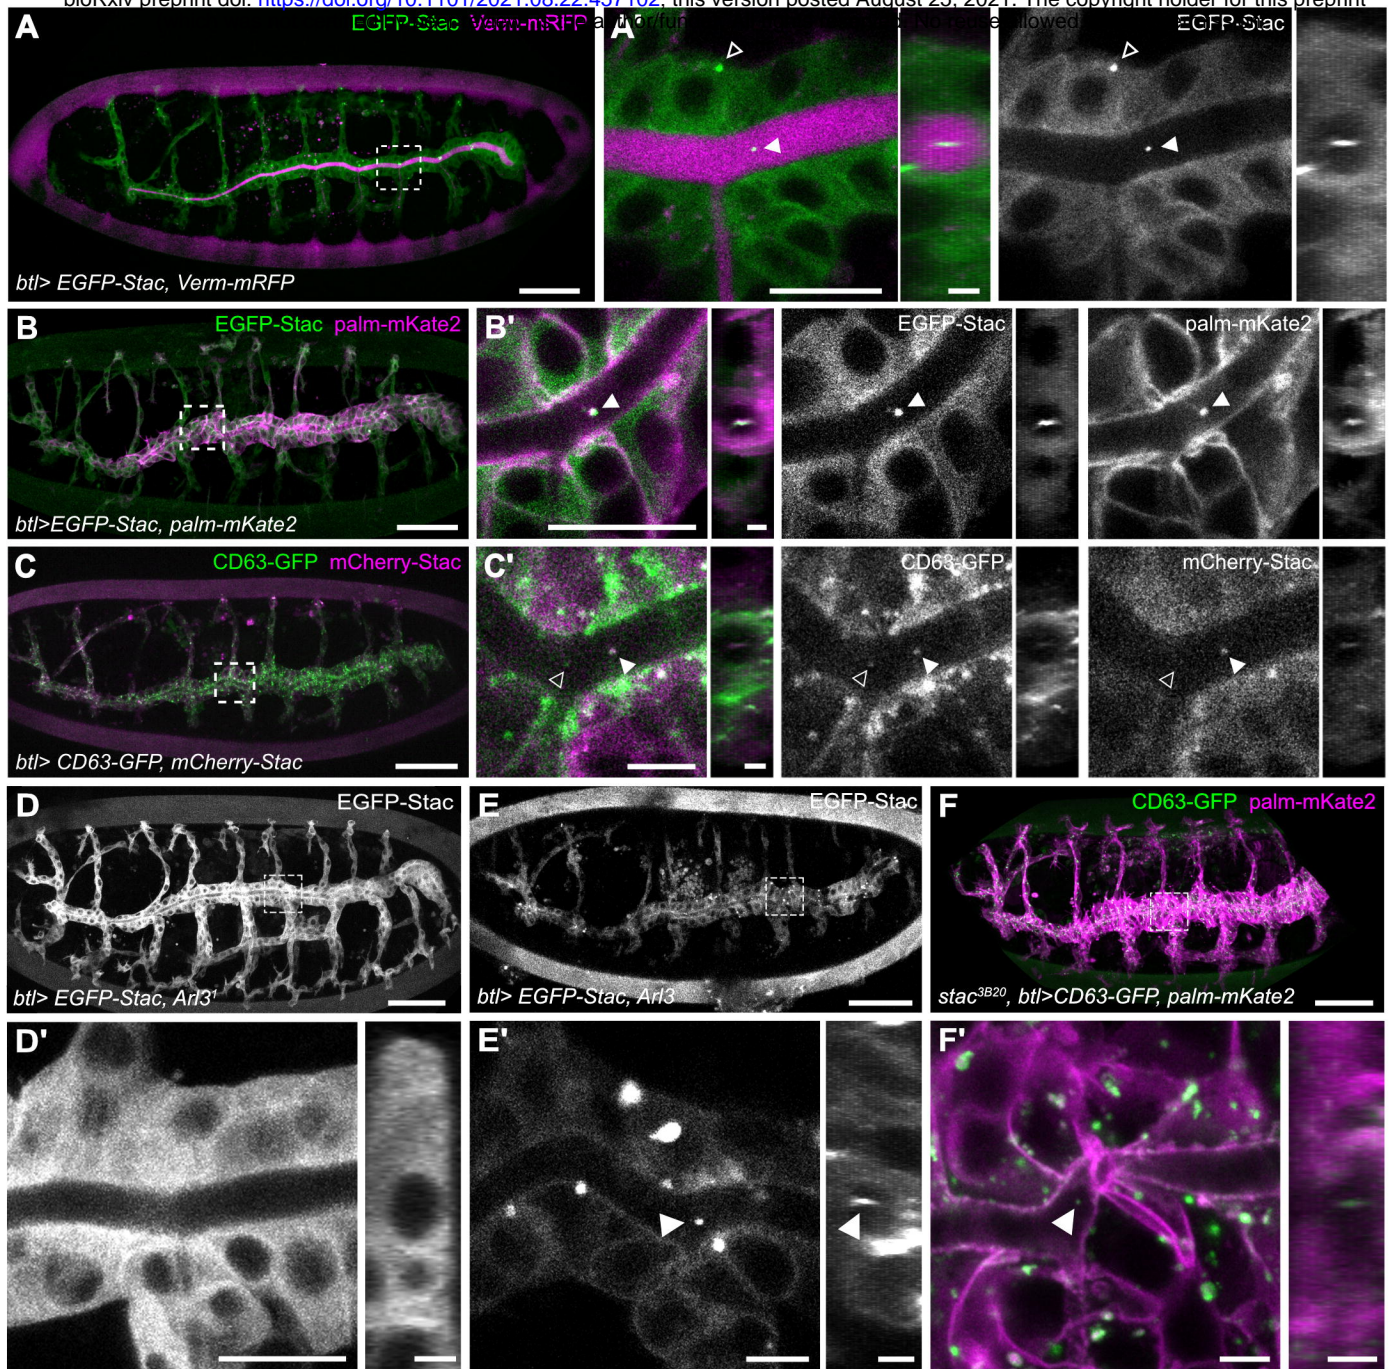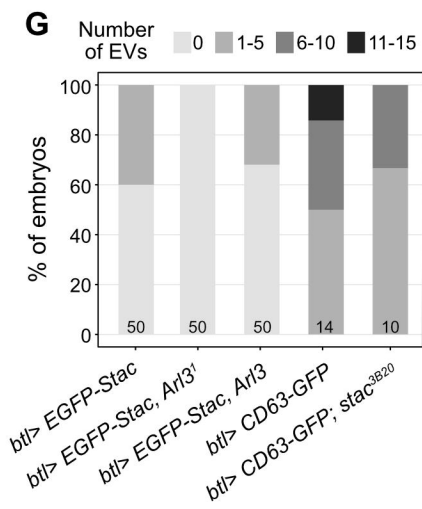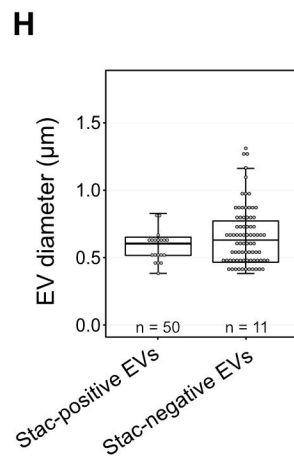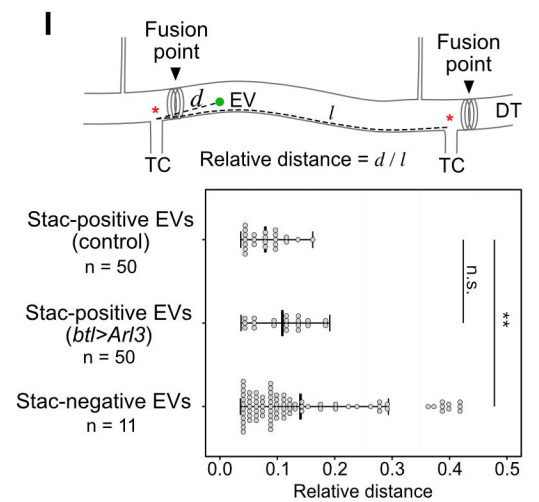



## Figure 2

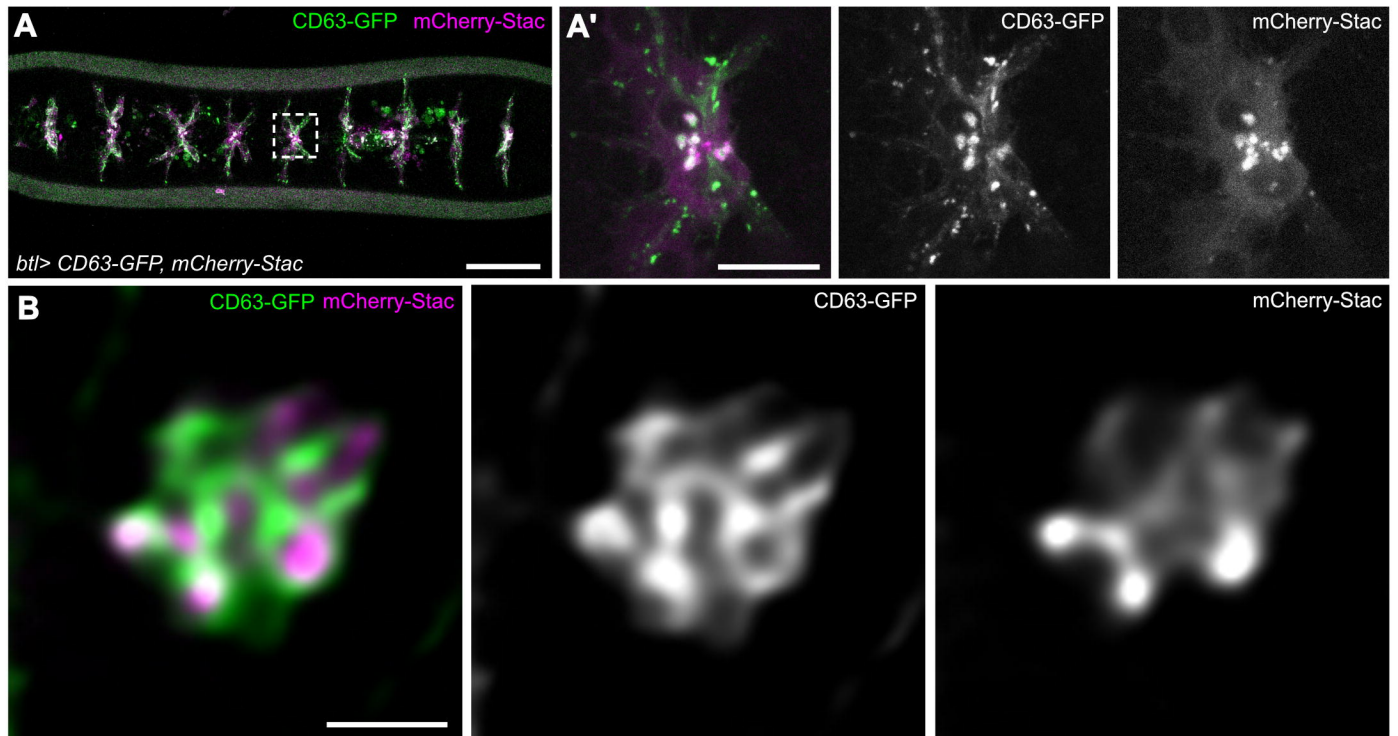

### Figure 3

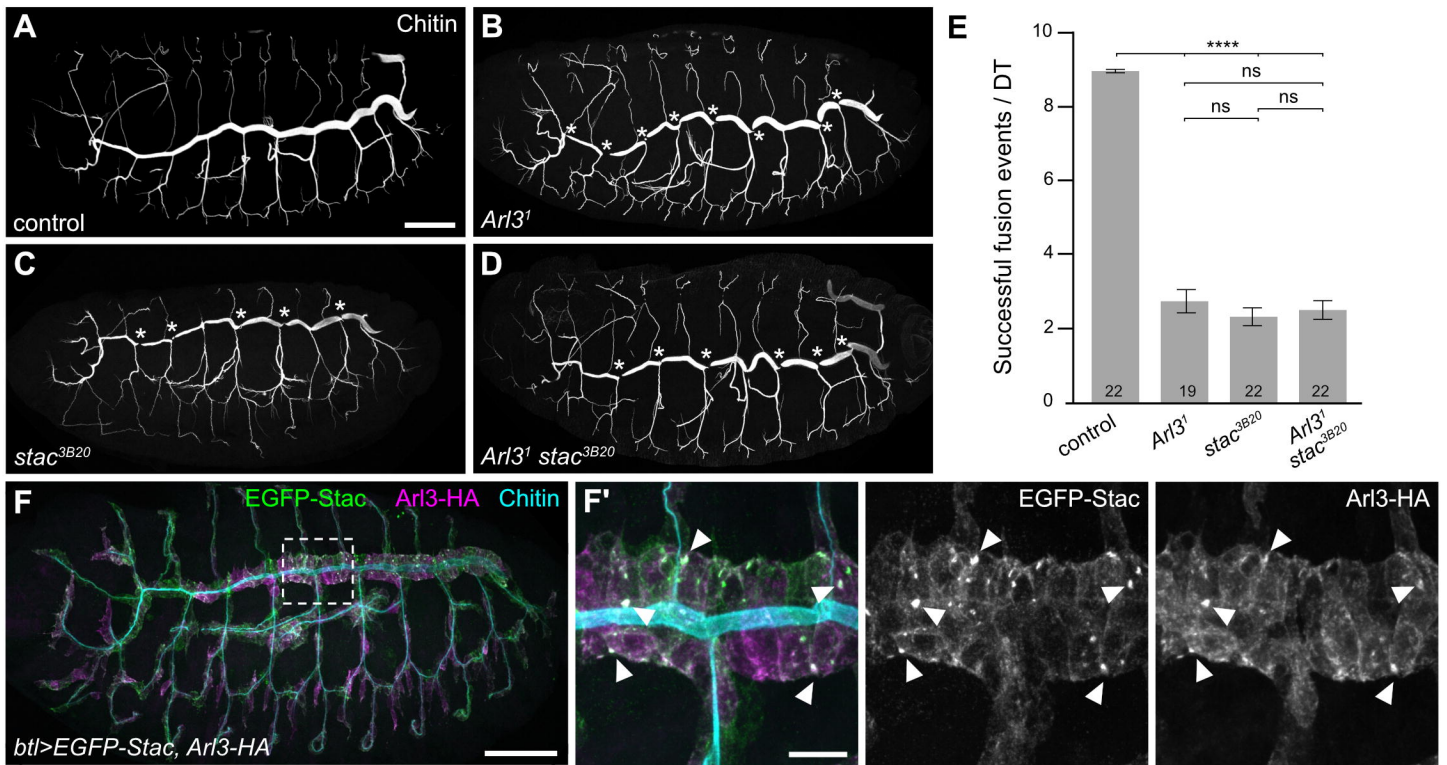

# Figure 4

bioRxiv preprint doi: <https://doi.org/10.1101/2021.08.22.457102>; this version posted August 25, 2021. The copyright holder for this preprint (which was not certified by peer review) is the author/funder. All rights reserved. No reuse allowed without permission.

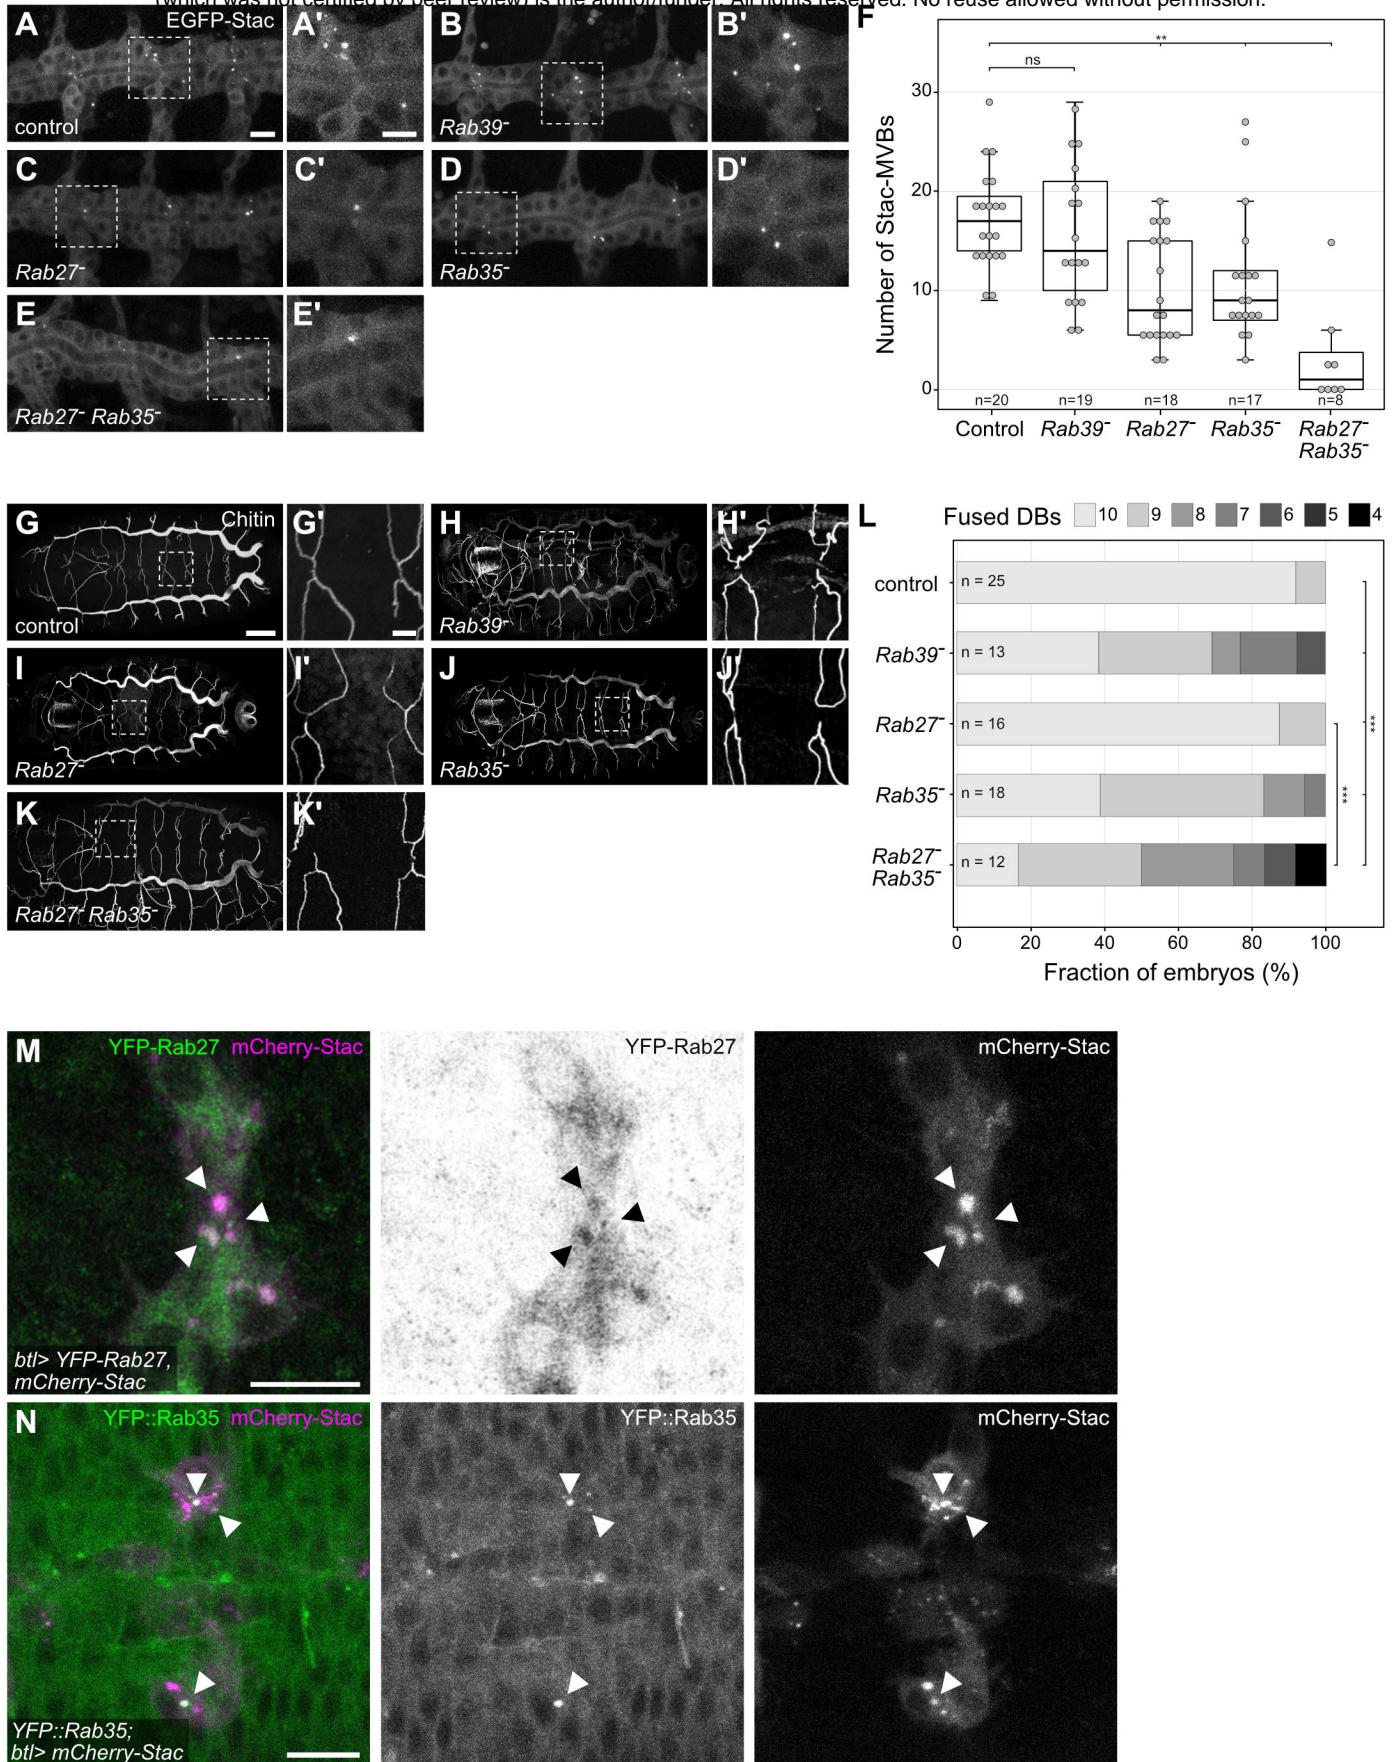

Source: https://www.biorxiv.org/content/10.1101/2021.08.22.457102v2.full.pdf
